# Supplementary material for: Plant Hormones Differentially Control the Sub-Cellular Localization of Plasma Membrane Microdomains during the Early Stage of Soybean Nodulation
Source: MDPI journal article supplement (doi:10.3390/genes10121012), 2019-12-05
Supplement: s1 [file s1]

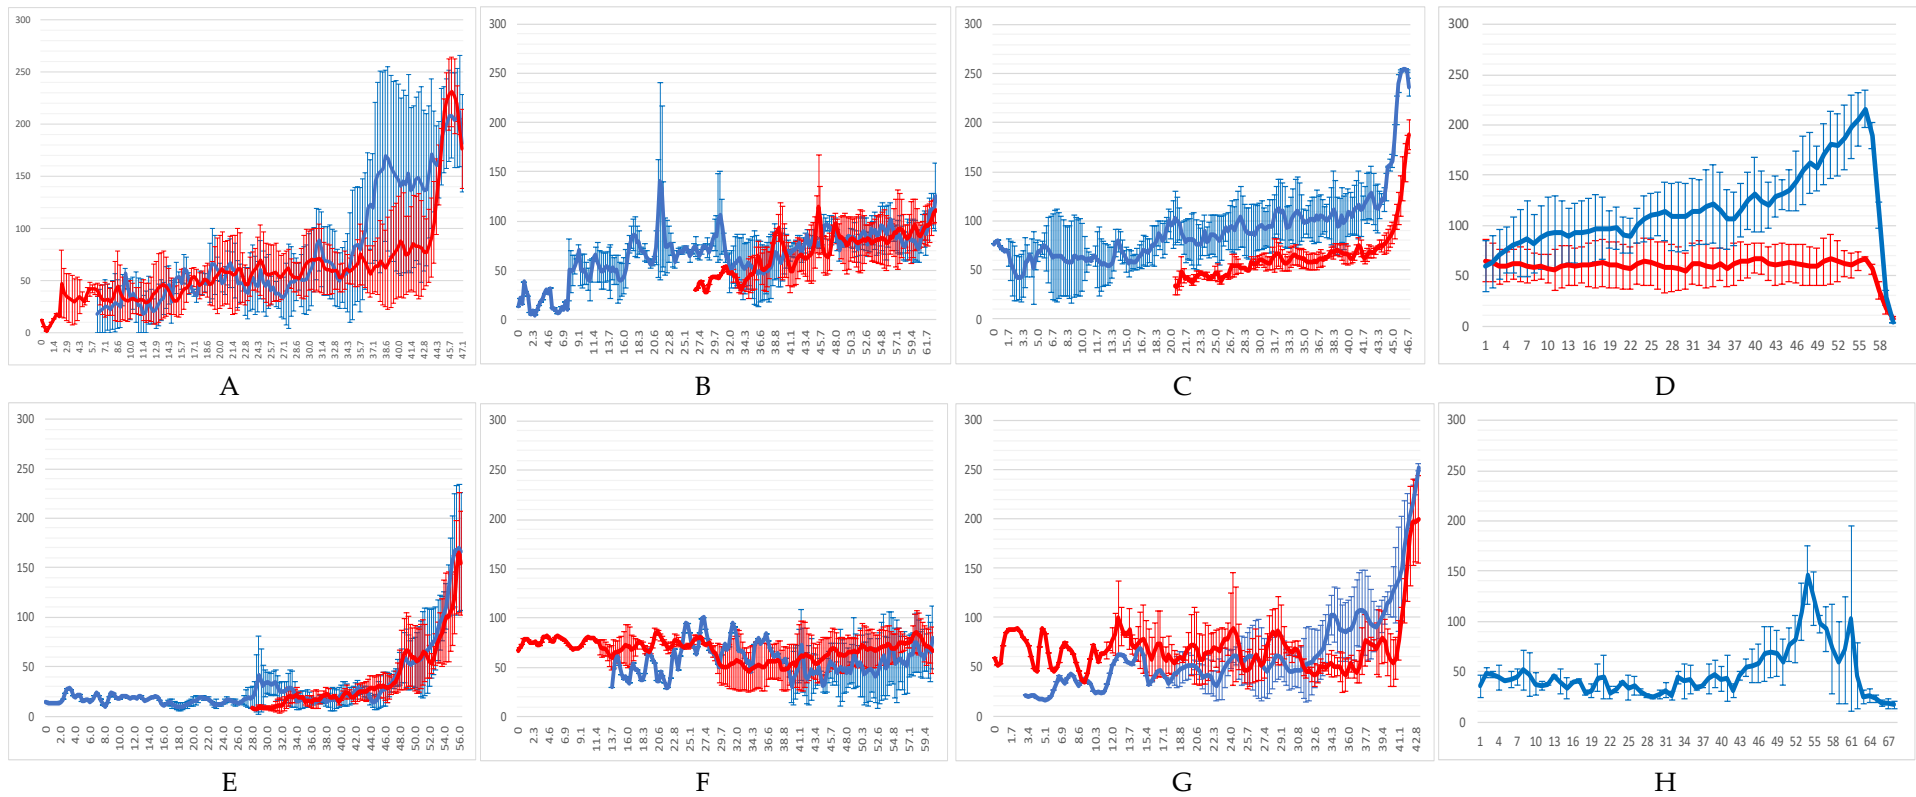

**Supplemental Figure S1.** Quantification of the intensity of the fluorescence (y-axis) of the GmFWL1-GFP (A–D, H) and mCherry-GmFLOT2/4 proteins (E, F and G) in mock- (Red) and *B. diazoefficiens*-inoculated (Blue) soybean root hair cells (x-axis,  $\mu\text{m}$ ), under treatments of Auxin (A and E), Cytokinin (B and F), SA (C and G), and in response to L-kynurenine (D) or L-kynurenine and 2,3,5-triodobenzoic acid (H). The figure showed average intensity of 3 root hair cells, and the error bar showing the standard error of the intensity of the fluorescence of the GFP and mCherry proteins.
